# Supplementary material for: Small Molecule Receptor Binding Inhibitors with In Vivo Efficacy against Botulinum Neurotoxin Serotypes A and E
Source: MDPI journal article supplement (doi:10.3390/ijms22168577), 2021-08-09

IC50 curves of the selected compounds described in the study.

ATA

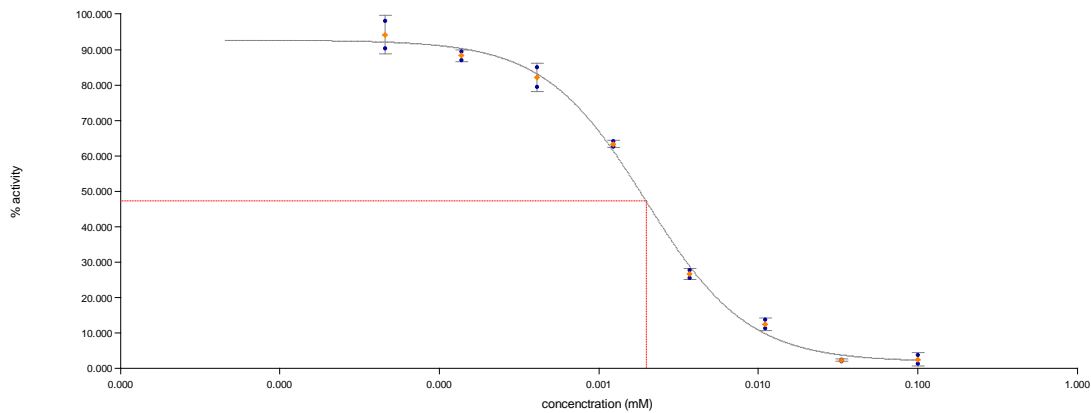

6-OHD

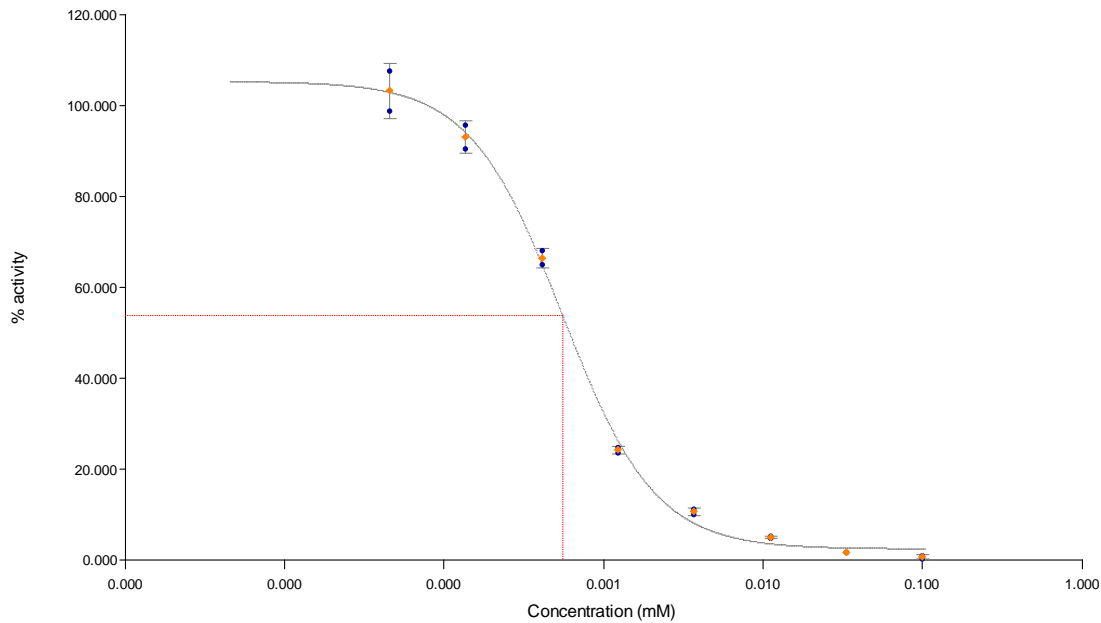

### Benserazide

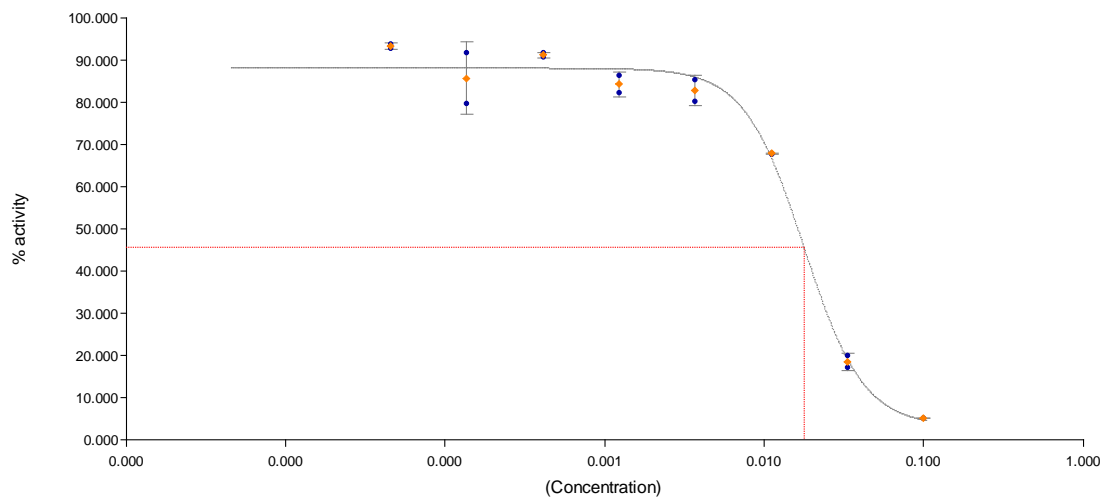

### Cephalosporin C zinc salt

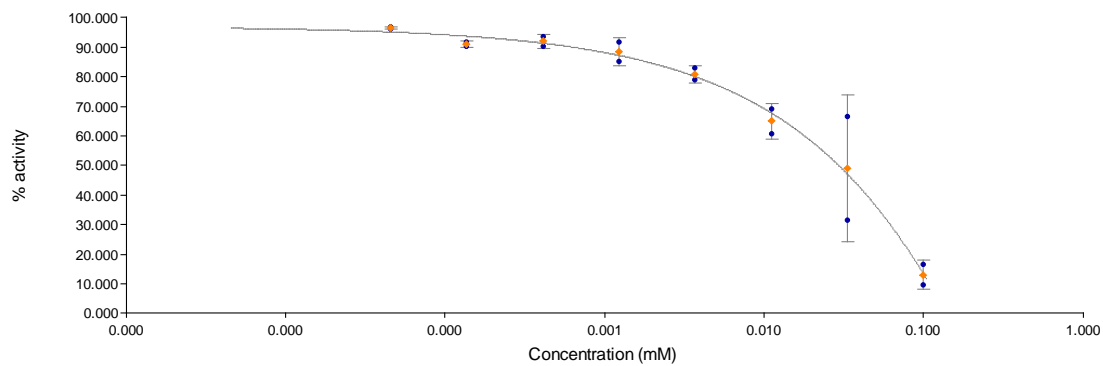

### Cefotaxime sodium

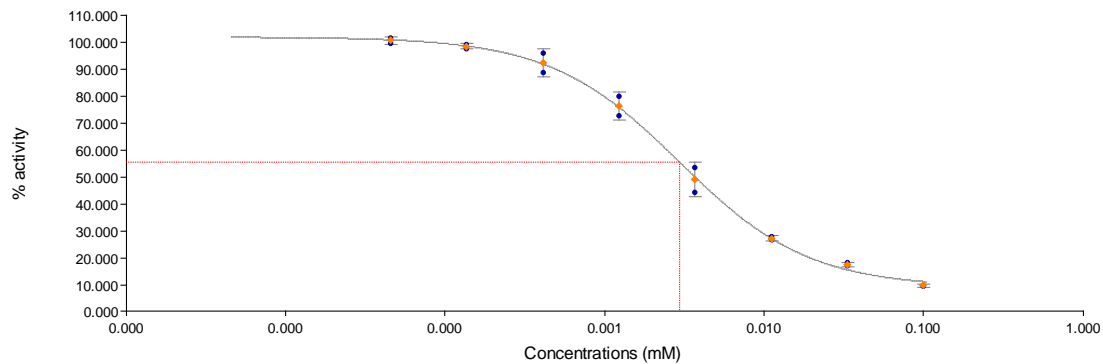

Protoporphyrin IX disodium (PPIX)

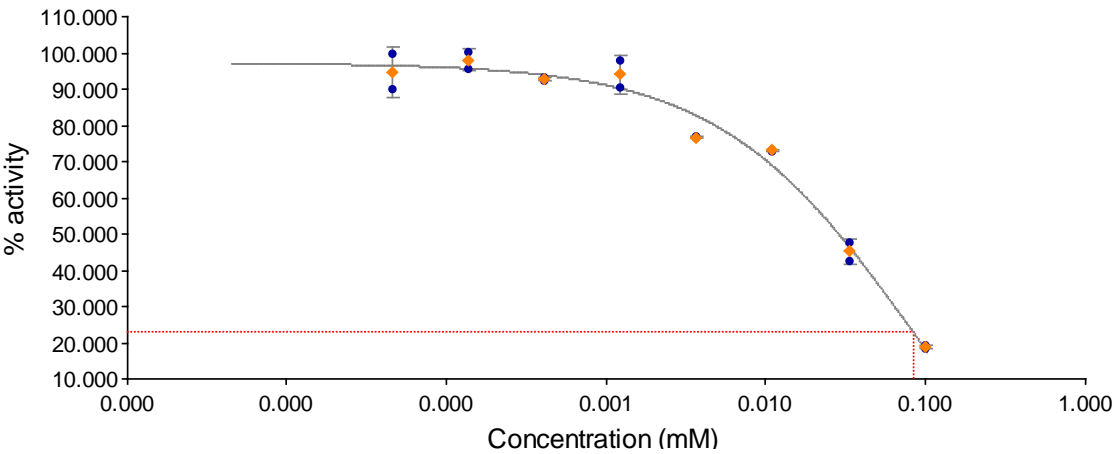

Pyridostatin

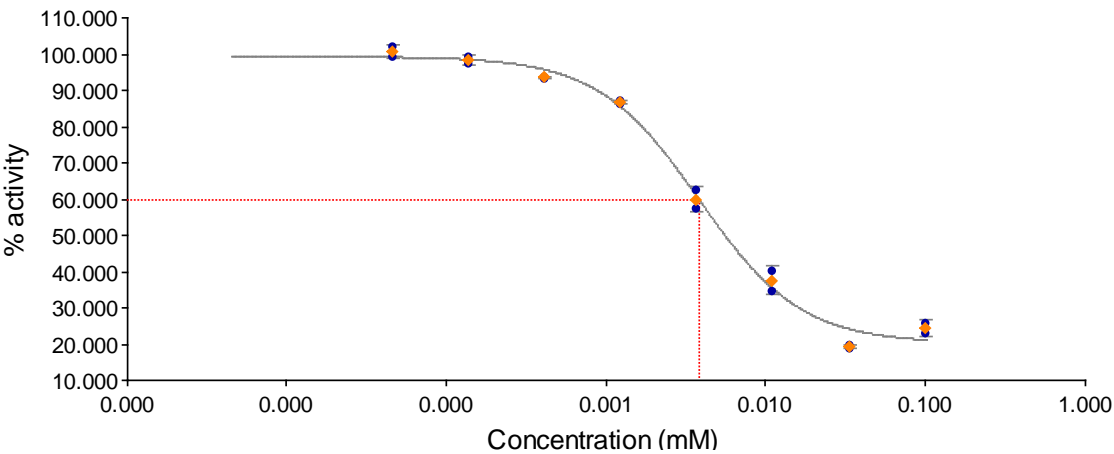

# Isoxanthopterin

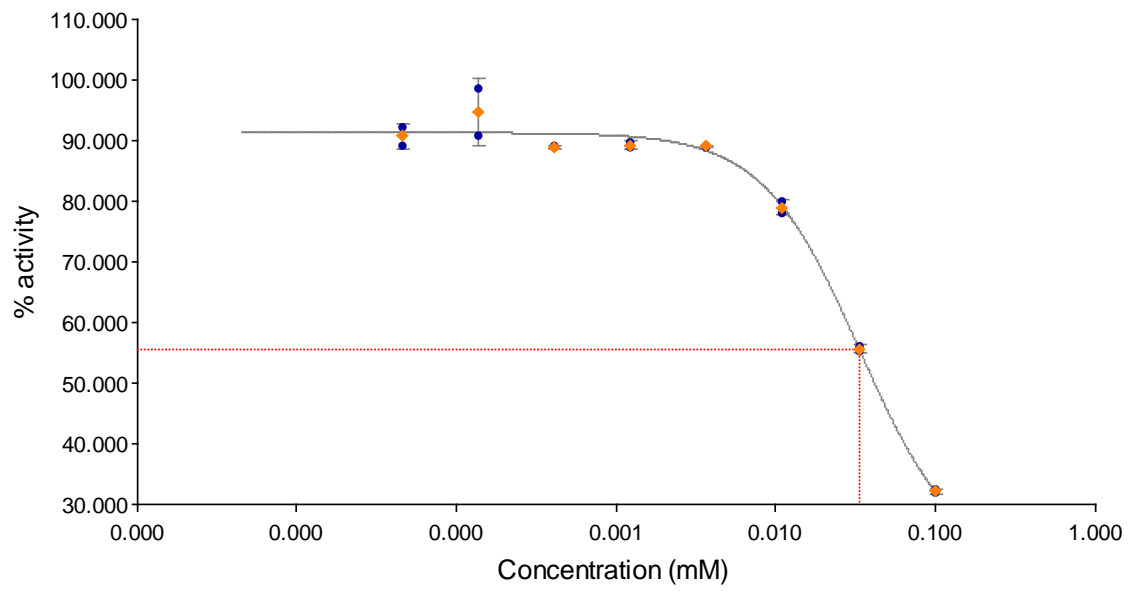

Supplement: s1 [file s1]
